# Supplementary material for: Somatostatin Receptor PET/CT Imaging for the Detection and Staging of Pancreatic NET: A Systematic Review and Meta-Analysis
Source: MDPI journal article supplement (doi:10.3390/diagnostics10080598), 2020-08-16
Supplement: s1 [file s1]

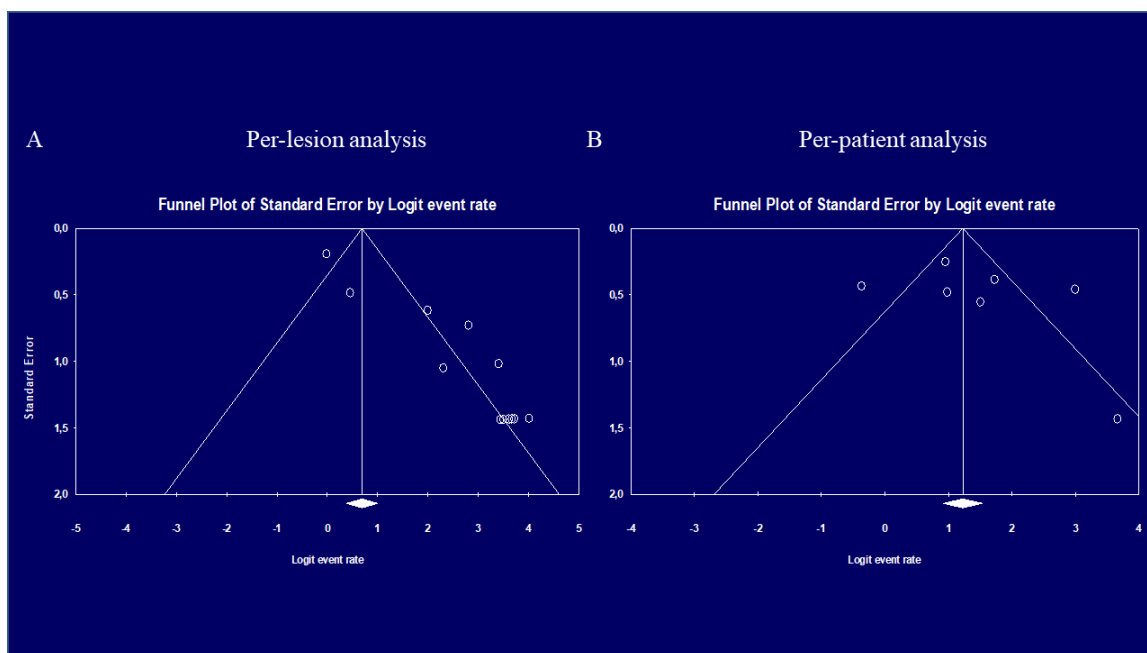

Figure S1: A-B. Funnel Plots for publication biases at the lesion-based and patient-based analyses.
